# Supplementary material
Source: HighWire-hosted journal article supplement (https://www.jrheum.org/highwire/filestream/37111/field_highwire_adjunct_files/0/190396DataSuppl.pdf)
Supplement: 190396DataSuppl.pdf [file 190396DataSuppl.pdf]

ONLINE SUPPLEMENTARY MATERIAL

**Supplementary Table 1.** Characteristics of subjects who had a clinical evaluation performed versus subjects who were lost to follow-up (Non-participants column).

|                                    | Non-Participants<br>(n=290)<br>% or mean | Participants<br>(n=493)<br>% or mean | p-value<br>(x2 or t-test) |
|------------------------------------|------------------------------------------|--------------------------------------|---------------------------|
| Females                            | 74.5                                     | 80.7                                 | 0.040                     |
| Education level                    |                                          |                                      |                           |
| Low                                | 43.4                                     | 33.7                                 |                           |
| Middle                             | 43.0                                     | 53.5                                 | 0.014                     |
| High                               | 13.6                                     | 12.8                                 |                           |
| Urban residence                    | 79.0                                     | 85.1                                 | 0.025                     |
| Self-reported arthritis            | 43.4                                     | 47.0                                 | 0.336                     |
| Self-reported rheumatoid arthritis | 12.8                                     | 18.1                                 | 0.054                     |
| Age (mean)                         | 61.1                                     | 60.9                                 | 0.565                     |
| ACPA (mean)                        | 44.7                                     | 46.6                                 | 0.938                     |
| CRP (mean)                         | 0.49                                     | 0.45                                 | 0.578                     |
| FR (mean)                          | 53.6                                     | 28.2                                 | 0.234                     |

**Supplementary Table 2.** Multivariate logistic regression results calculating the odds of non-participation

| Exposure           |                | Estimate | CI 95% |       | p-value |
|--------------------|----------------|----------|--------|-------|---------|
| Gender             | Female vs male | -0.40    | -0.76  | -0.05 | 0.026   |
| Education level    | Middle vs low  | -0.47    | -0.79  | -0.14 | 0.004   |
|                    | High vs low    | -0.17    | -0.65  | 0.30  | 0.477   |
| Place of residence | Rural vs urban | 0.39     | 0.00   | 0.77  | 0.049   |

**Supplementary Table 3.** Univariate logistic regressions for each demographic variable predicting RA diagnosis.

| Exposure           |                                         | OR (CI95%)       | p-value |
|--------------------|-----------------------------------------|------------------|---------|
| Gender             | Females vs males                        | 7.8 (1.8-33.7)   | 0.006   |
| Age                | 31-54 vs 55+ years                      | 1.6 (0.4-5.8)    | 0.498   |
| Educational level  | Middle vs low                           | 0.3 (0.1-0.9)    | 0.024   |
|                    | High vs low                             | 1.6 (0.3-8.0)    | 0.533   |
| Civil status       | Single vs married                       | 0.5 (0.2-1.9)    | 0.344   |
|                    | Stable couple vs married                | 0.1 (0.0-0.5)    | 0.011   |
|                    | Separated/divorced vs married           | 0.5 (0.1-2.8)    | 0.459   |
|                    | Widow vs married                        | 0.7 (0.1-3.8)    | 0.673   |
| Work status        | Unemployed vs Paid Employment           | 0.4 (0.0-5.7)    | 0.526   |
|                    | Housewife vs Paid Employment            | 3.5 (0.5-26.8)   | 0.222   |
|                    | Retired vs Paid Employment              | 1.9 (0.3-11.8)   | 0.483   |
|                    | Permanently Disabled vs Paid Employment | 24.6 (3.7-163.9) | 0.001   |
|                    | Student vs Paid Employment              |                  |         |
|                    | Other vs Paid Employment                | 12.3 (0.9-161.9) | 0.057   |
|                    |                                         |                  |         |
| Place of residence | Rural vs Urban                          | 0.4 (0.1-1.5)    | 0.175   |

**Supplementary Table 4.** Multivariate logistic regression including all significant variables in the univariate logistic models predicting RA diagnosis.

| Exposure          |                                         | OR (CI95%)        | p-value |
|-------------------|-----------------------------------------|-------------------|---------|
| Gender            | Females vs males                        | 22.7 (4.3-119.7)  | <0.001  |
| Educational level | Middle vs low                           | 0.4 (0.1-1.3)     | 0.135   |
|                   | High vs low                             | 4.0 (0.9-18.9)    | 0.075   |
| Civil status      | Single vs married                       | 0.4 (0.1-1.7)     | 0.220   |
|                   | Stable couple vs married                | 0.1 (0.0-0.6)     | 0.016   |
|                   | Separated/divorced vs married           | 0.5 (0.1-2.9)     | 0.419   |
|                   | Widow vs married                        | 0.2 (0.0-1.8)     | 0.151   |
| Work status       | Unemployed vs Paid Employment           | 0.7 (0.1-9.9)     | 0.818   |
|                   | Housewife vs Paid Employment            | 1.8 (0.2-17.4)    | 0.615   |
|                   | Retired vs Paid Employment              | 1.8 (0.3-10.2)    | 0.492   |
|                   | Permanently Disabled vs Paid Employment | 81.8 (11.2-599.0) | <0.001  |
|                   | Student vs Paid Employment              | -                 | -       |
|                   | Other vs Paid Employment                | -                 | -       |
|                   |                                         |                   |         |
